# Supplementary material for: Controlled Release Mechanism of Vancomycin from Double-Layer Poly-L-Lactic Acid-Coated Implants for Prevention of Bacterial Infection
Source: MDPI journal article supplement (doi:10.3390/polym14173493), 2022-08-26
Supplement: s1 [file s1]

## Supplementary Materials

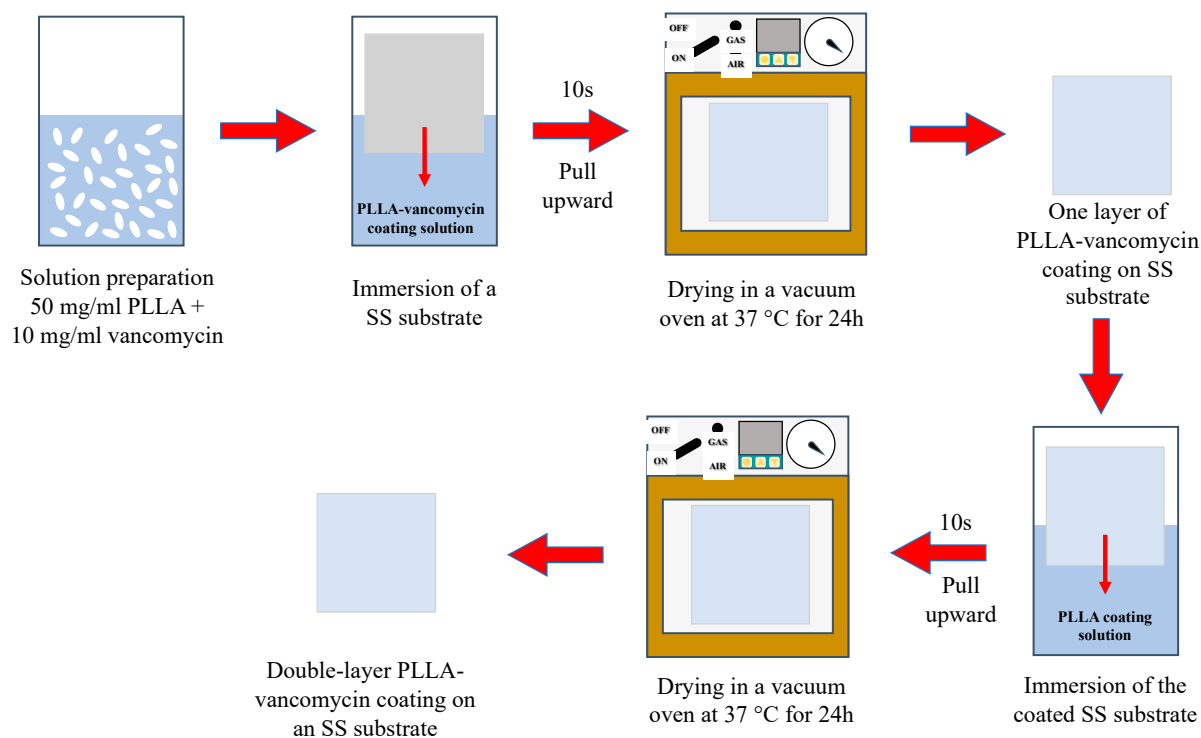

**Figure S1.** Schematic diagram of the preparation procedure of the double-layer PLLA-vancomycin coating on a stainless steel substrate. Note that SS represents a stainless steel substrate.

**Table S1.** Preparation and composition of simulated body fluid (SBF).

All reagents (Sigma-Aldrich, Singapore) in the table below were added to 500 mL of distilled water under constant stirring until the solution was homogeneous. The temperature and pH of the buffer were adjusted to 36.5 °C and 7.40, respectively. The total volume of the buffer was finally adjusted to one liter. The buffer was stored at 4 °C until use.

Reagents for SBF preparation:

| Order | Reagent                                            | Amount  |
|-------|----------------------------------------------------|---------|
| 1     | NaCl                                               | 7.996 g |
| 2     | NaHCO <sub>3</sub>                                 | 0.350 g |
| 3     | KCl                                                | 0.224 g |
| 4     | K <sub>2</sub> HPO <sub>4</sub> ·3H <sub>2</sub> O | 0.228 g |
| 5     | MgCl <sub>2</sub> ·6H <sub>2</sub> O               | 0.305 g |
| 6     | 1M-HCl                                             | 40 mL   |
| 7     | CaCl <sub>2</sub>                                  | 0.278 g |
| 8     | Na <sub>2</sub> SO <sub>4</sub>                    | 0.071 g |
| 9     | (CH <sub>2</sub> OH) <sub>3</sub> CNH <sub>2</sub> | 6.057 g |

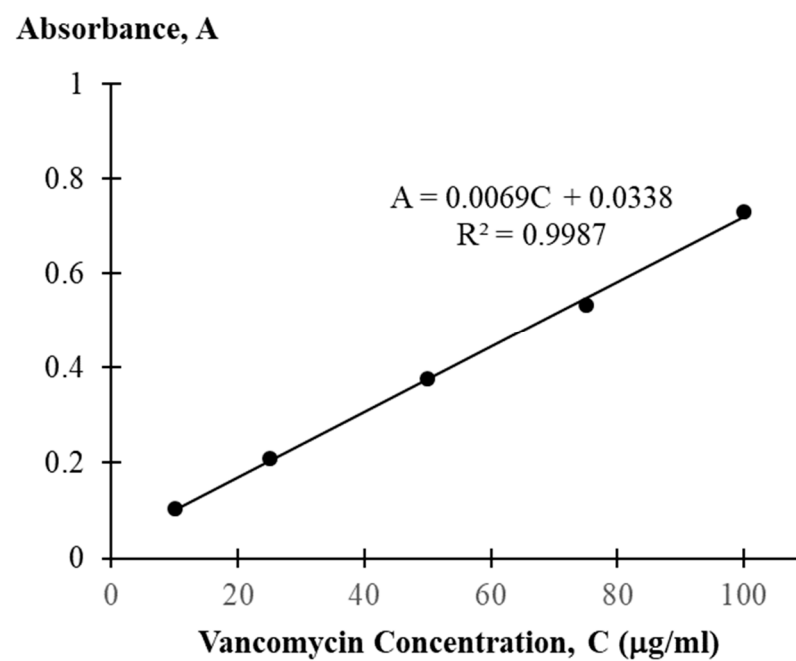

**Figure S2.** Calibration curve of vancomycin in SBF for colorimetric quantitation.
